# Supplementary material
Source: HighWire-hosted journal article supplement (https://lupus.bmj.com/content/6/1/e000336)
Supplement: inline-supplementary-material-1 [file inline-supplementary-material-1.docx]

**Appendix Table 1.** List of advisorsand presenters at the second International Summit on Interferons in Inflammatory Diseases

| **Chairs** | **Affiliations** |
| --- | --- |
| Mary K. Crow, MD  CrowM@HSS.EDU | Hospital for Special Surgery  New York, NY, USA |
| Lars Rönnblom, MD, PhD  lars.ronnblom@medsci.uu.se | Uppsala University  Uppsala, Sweden |

| **United States** | **Affiliations** |
| --- | --- |
| Rohit Aggarwal, MD, MS  aggarwalr@upmc.edu | University of Pittsburgh  Pittsburgh, PA, USA |
| Franck Barrat, PhD  BarratF@hss.edu | HSS Research Institute  New York, NY, USA |
| Zach Brohawn, MBA  brohawnp@medimmune.com | MedImmune  Gaithersburg, MD, USA |
| Richard A. Furie, MD rfurie@northwell.edu | Northwell Health Physician Partners  Great Neck, NY, USA |
| J. Michelle Kahlenberg, MD, PhD mkahlenb@umich.edu | University of Michigan  Ann Arbor, MI, USA |
| Mariana Kaplan, MD kaplanmj@mail.nih.gov | National Institutes of Health  Bethesda, MD, USA |
| Kevin King, MD, PhD  krking@ucsd.edu | University of California, San Diego  La Jolla, CA, USA |
| R. John Looney, MD John_Looney@urmc.rochester.edu | University of Rochester Medical Center  Rochester, NY, USA |
| Andy Minn, MD, PhD  andyminn@upenn.edu | University of Pennsylvania  Philadelphia, PA, USA |
| Dana Orange, MD, MS  dorange@rockefeller.edu | The Rockefeller University  New York, NY, USA |
| Maria Virginia Pascual, MD  vip2021@med.cornell.edu | Weill Cornell Medical College  New York, NY, USA |
| Lishan Su, MD, PhD  lishan_su@med.unc.edu | University of North Carolina  Chapel Hill, NC, USA |
| Raj Tummala, MD, MS  Raj.Tummala@astrazeneca.com | AstraZeneca  Gaithersburg, MD, USA |
| Jennifer Po-wen Wang, MD  Jennifer.Wang@umassmed.edu | University of Massachusetts  Worcester, MA, USA |
| Wendy White, PhD  WhiteW@MedIummune.com | MedImmune  Gaithersburg, MD, USA |

| **Europe** | **Affiliations** |
| --- | --- |
| Simon Bowman, FRCP, CCST, PhD, MRCP, MB BS, BSc  Simon.Bowman@uhb.nhs.uk | Milton Keynes University Hospital  Milton Keynes, United Kingdom |
| Francesco Del Gado, MD, PhD  F.delgaldo@leeds.ac.uk | NIHR Leeds Biomedical Research Centre  Leeds, United Kingdom |
| Adrian Hayday, FRS, FMedSci  adrian.hayday@crick.ac.uk | The Francis Crick Institute  London, United Kingdom |
| Falk Hiepe, MD, PhD falk.hiepe@charite.de | Charité Universitätsmedizin  Berlin, Germany |
| Anne O’Garra, PhD, FRS, FMedSci  anne.ogarra@crick.ac.uk | The Francis Crick Institute  London, United Kingdom |
| Christopher Richez, MD, PhD  christophe.richez@chu-bordeaux.fr | Hôpital Pellegrin  Bordeaux, France |
| Edward Vital, MD, ChB, MRCP, PhD  e.m.j.vital@leeds.ac.uk | University of Leeds  Leeds, United Kingdom |

| **Australia** | **Affiliation** |
| --- | --- |
| Eric Morand, MB, BS (Hons), FRACP, PhD  Eric.Morand@monash.edu | Monash University  Melbourne, Australia |
